# Supplementary material for: A Novel ALDH1A1 Inhibitor Targets Cells with Stem Cell Characteristics in Ovarian Cancer
Source: PubMed Central journal article supplement (PMC6521036; doi:10.3390/cancers11040502), 2019-04-08

Supplementary Materials

# A Novel ALDH1A1 Inhibitor Targets Cells with Stem Cell Characteristics in Ovarian Cancer

Nkechiyere G. Nwani, Salvatore Condello, Yinu Wang, Wendy M. Swetzig, Emma Barber, Thomas Hurley and Daniela Matei

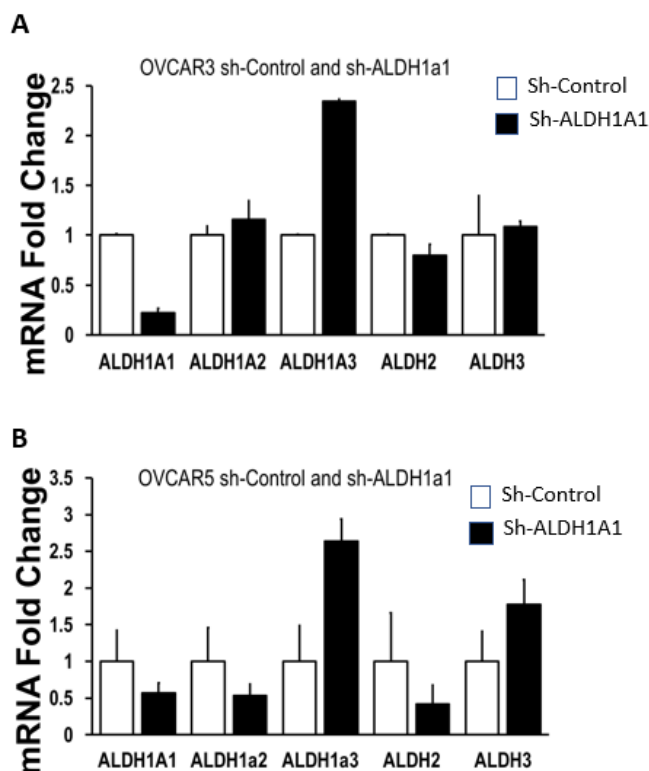

| Up/Down Regulation (Compared to Control Group) |                |
|------------------------------------------------|----------------|
| Symbol                                         | 1 $\mu$ M CM37 |
| NEIL3                                          | 2.98           |
| RAD21                                          | 10.8           |
| RAD23a                                         | 8.01           |

**Figure 1.** ALDH1A3 expression in cells transfected with sh-RNA targeting ALDH1A1 or scrambled shRNA: (A,B) qRT-PCR was used to assess ALDH isoform expression levels in OVCAR3 (A) and OVCAR5 (B) cells stably transfected with sh-ALDH1A1 viral particles.

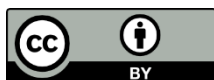

Supplement: cancers-11-00502-s001.pdf [file cancers-11-00502-s001.pdf]
